1 **Existential suffering as a motive for assisted suicide: difficulties,**  
2 **acceptability, management and roles from the perspectives of**  
3 **Swiss professionals**

4  
5 **Marie-Estelle Gaignard** <sup>a, b</sup>, **Sophie Pautex**<sup>c</sup>, **Samia Hurst** <sup>a</sup>

6  
7 a. Institute for Ethics, History and the Humanities, Faculty of Medicine, University of Geneva,  
8 Geneva, Switzerland.

9 b. Department of Oncology, Geneva University Hospitals, Geneva, Switzerland.

10 c. Division of palliative medicine Department of rehabilitation and geriatrics, Geneva  
11 University Hospitals, Geneva, Switzerland.

12  
13  
14 **\*Corresponding author: Marie-Estelle Gaignard**

15 E-mail: [marieestellegaignard@gmail.com](mailto:marieestellegaignard@gmail.com) (MG)

16  
17  
18 **Word count:**

19 - Abstract: 299

20 - Article (without tables): 4'384

21  
22  
23  
24  
25 **NOTE: This preprint reports new research that has not been certified by peer review and should not be used to guide clinical practice.**

26 **ABSTRACT**

27

28 **Background.** Existential suffering is often a part of the requests for assisted suicide (AS). Its  
29 definitions have gained in clarity recently and refer to a distress arising from an inner realization  
30 that life has lost its meaning. There is however a lack of consensus on how to manage  
31 existential suffering, especially in a country where AS is legal and little is known about the  
32 difficulties faced by professionals confronted with these situations.

33 **Objectives.** To explore the perspectives of Swiss professionals involved in end-of-life care  
34 and assisted suicide on the management of existential suffering when it is part of AS requests,  
35 taking into account the question of roles, as well as on the difficulties they encounter along the  
36 way and their views on the acceptability of existential suffering as a motive for AS.

37 **Methods.** A qualitative study based on face-to-face interviews was performed among twenty-  
38 six participants from the fields of palliative and primary care as well as from EXIT right-to-die  
39 organization. A semi-structured interview guide exploring four themes was used. Elements  
40 from the grounded theory approach were applied.

41 **Results.** Almost all participants reported experiencing difficulties when facing existential  
42 suffering. Two-thirds considered existential suffering as a justifiable reason for requesting AS.  
43 Concerning the management of existential suffering, participants referred to the notion of being  
44 present, respect, explore the suffering, give meaning, working together, psychological support,  
45 spiritual support, relieve physical symptoms and palliative sedation.

46 **Conclusion.** This study offers a unique opportunity to reflect on what are desirable responses  
47 to existential suffering when it is part of AS requests. Existential suffering is plural and certainly  
48 implies a multiplicity of responses as well. These situations remain however difficult and  
49 controversial according to Swiss professionals. Clinicians' education should better address  
50 these issues and give them the tool to take care of patients with existential suffering.

51 **BACKGROUND**

52

53 Existential suffering is often a part of the requests for assisted suicide (AS).(1–3) The  
54 acceptability of existential suffering as a motive for AS is still a complex and controversial issue  
55 that is regularly debated in the medical literature.(4) According to recent definition, existential  
56 suffering refers to a distress arising from an inner realization that life has lost its meaning.(5–  
57 8) Everybody can have existential concerns at any time of life but there is evidence that for  
58 patients at the end of life, those can increase their wish to hasten death.(9) As reported in our  
59 precedent paper, existential suffering was interpreted by Swiss professionals confronted to AS  
60 as a life that wasn't worth living any longer and/or a life that did not make sense anymore, for  
61 many different reasons such as physical decline and loneliness.(10) We found that in most  
62 cases existential suffering consisted of different, and sometimes compounded, losses of the  
63 dimensions of life.

64 A certain clinical clarity on what existential suffering is is being acquired lately which  
65 should hopefully improve the evaluation and management of this kind of suffering in the coming  
66 years. Several questions then arise: how should we concretely manage existential suffering?  
67 After having explored and proposed other alternatives, is AS an acceptable solution to  
68 existential suffering? For recall, Switzerland has one of the most liberal legislations on AS in  
69 the world. The law does not specify requirements in terms of suffering. According to the SAMS  
70 (Swiss Academy of Medical Sciences), which provides healthcare professionals with  
71 recommendations on ethics issues, the assisting person has to verify that five conditions are  
72 present, including that the symptoms of the patient's disease and/or her functional impairments  
73 are a source of "intolerable suffering" and that "medically indicated treatment options and other  
74 types of assistance and support have been sought and have provided ineffective or are  
75 rejected as unacceptable by the patient".(11) This lack of consensus on what these  
76 approaches are and on how to manage existential suffering often leads to a feeling of  
77 helplessness in physicians and other health care professionals.(12–15)

78 Other authors, mainly from the palliative care field, have already addressed this issue  
79 and have suggested the importance of being present for the patient, the use of psycho-  
80 existential approaches and the promotion of spiritual care.(6,16–21) A 2008 review (9) reported  
81 on eight “existentially-informed interventions” addressing existential concerns that have the  
82 potential to positively impact a person’s well-being and overall quality of life at the end of life.  
83 Dignity therapy is one of the studied interventions that has certainly gained in recognition  
84 recently.(22) Although promising, these approaches are still too rarely used systematically in  
85 our hospitals. Another new and promising therapeutic approach is the use of classic  
86 serotonergic psychedelics in the management of patients with refractory depression and/or  
87 anxiety at the end of life.(23–25) Indeed, to date, no pharmacological approach has shown a  
88 significant benefit in the management of existential suffering. Palliative sedation is also subject  
89 to controversies.(2,13) The European Association for Palliative Care (EAPC) stated in 2009  
90 that “palliative sedation may be considered for severe non-physical symptoms such as  
91 refractory depression, anxiety, demoralization or existential distress”, after taking into account  
92 several considerations.(1,4,26)

93 Another poorly investigated issue is that of roles in the management of existential  
94 suffering. So far, a few studies have pointed out the importance of different stakeholders such  
95 as nurses who are at the front line and can thus better recognize and evaluate existential  
96 suffering.(18,27,28) Mental healthcare professionals, such as psychotherapists and  
97 psychiatrists, and members of religious communities have also been recognized as playing an  
98 important role in the management of existential suffering.(13)

99 To our best knowledge, this is the first study investigating the perspectives of  
100 professionals on the management of existential suffering when it is part of the request for AS,  
101 all the more in a country where AS is legal. This paper, which constitutes the second part of  
102 our study, focuses on how Swiss professionals involved in end-of-life care and assisted suicide  
103 view the management of existential suffering, taking into account the question of roles. This  
104 study also explores the difficulties they may encounter along the way and their views on the  
105 acceptability of existential suffering as a motive for AS.

106 **METHODS**

107

108 This exploratory national study involved a full spectrum of persons engaged in end-of-life care  
109 and assisted suicide in Switzerland. A detailed description of the method was reported in our  
110 previous paper.(10) **Table 1** summarizes its main features. A qualitative design was chosen  
111 for this study because of the lack of insights on the subject. Sampling was purposive, data  
112 were collected from face-to-face interviews, and data saturation was obtained after completing  
113 20 interviews. Elements from the grounded theory approach were used to develop a  
114 conceptual model derived from the data.

115 In the following results, extracts of the quotations have been selected to illustrate ideas  
116 and concepts described by the participants. All transcripts were translated from the original  
117 French by the authors. People identification is labelled as follows: Pn (*Participant number*) /  
118 PallCP (*Palliative Care Providers*) or PrimCP (*Primary Care Providers*) or EV (*EXIT Volunteer*).

119 **Table 1 – Design of the study**

120

| <b>Qualitative approach</b>              | <b>Description</b>                                                                                                                                                                                                                                                                                                                                                                                                                                                                                                                                                                                                                                                                                                                                                                                                                                                        |
|------------------------------------------|---------------------------------------------------------------------------------------------------------------------------------------------------------------------------------------------------------------------------------------------------------------------------------------------------------------------------------------------------------------------------------------------------------------------------------------------------------------------------------------------------------------------------------------------------------------------------------------------------------------------------------------------------------------------------------------------------------------------------------------------------------------------------------------------------------------------------------------------------------------------------|
| <i>Research paradigm</i>                 | Constructivism                                                                                                                                                                                                                                                                                                                                                                                                                                                                                                                                                                                                                                                                                                                                                                                                                                                            |
| <i>Ethical Issues</i>                    | <ul style="list-style-type: none"> <li>- This study was exempted from ethics review by the president of the <i>CCER (Commission Cantonale d’Ethique de la Recherche, Swiss Cantonal Ethics Committee)</i> because the study entailed no more than minimal risks and was outside the scope of the Swiss Federal Act (Human Research Act, HRA) on research with human participants.</li> <li>- The participation was voluntary and did not involve the collection of personally identifiable information.</li> </ul>                                                                                                                                                                                                                                                                                                                                                        |
| <i>Sampling and recruitment strategy</i> | <ul style="list-style-type: none"> <li>- A purposive sampling strategy, and more specifically a snowball technique, was used to include participants that differed from background, age and years of experience to ensure different opinions.</li> <li>- A range of persons involved in end-of-life care and assisted suicide were therefore contacted and included into three groups (<i>Palliative Care Providers, Primary Care Providers or EXIT Volunteers</i>).</li> <li>- During this first contact, explanations regarding the goals and the modalities of the study were provided. Participants were also asked if they felt concerned by this issue and if they consented to take part of the study.</li> <li>- No further selection criteria was taken into account.</li> <li>- Written informed consent was obtained before starting the interview.</li> </ul> |
| <i>Sampling saturation</i>               | <ul style="list-style-type: none"> <li>- Data saturation was obtained after completing 20 interviews</li> <li>- Six additional interviews were conducted without new concepts emerging, to ensure full data saturation.</li> </ul>                                                                                                                                                                                                                                                                                                                                                                                                                                                                                                                                                                                                                                        |
| <i>Data collection period</i>            | Between February and April 2016                                                                                                                                                                                                                                                                                                                                                                                                                                                                                                                                                                                                                                                                                                                                                                                                                                           |

|                                    |                                                                                                                                                                                                                                                                                                                                                                                                                                                                                                                                                                                                                                                                                                                                                                                                                      |
|------------------------------------|----------------------------------------------------------------------------------------------------------------------------------------------------------------------------------------------------------------------------------------------------------------------------------------------------------------------------------------------------------------------------------------------------------------------------------------------------------------------------------------------------------------------------------------------------------------------------------------------------------------------------------------------------------------------------------------------------------------------------------------------------------------------------------------------------------------------|
| <i>Data collection methods</i>     | <ul style="list-style-type: none"> <li>- After this first contact, data was collected through face-to-face interviews at a location chosen by the participant.</li> <li>- At the beginning of each discussion the participants were asked their age, gender, job, and how many years of experience they had.</li> <li>- A semi-structured interview guide was used to conduct the conversation (<b>Supporting information 1: Table 2</b>)</li> <li>- All discussions were tape-recorded, transcribed verbatim and anonymized.</li> </ul>                                                                                                                                                                                                                                                                             |
| <i>Units of study</i>              | A story/case reported by participants                                                                                                                                                                                                                                                                                                                                                                                                                                                                                                                                                                                                                                                                                                                                                                                |
| <i>Duration of interviews</i>      | 20 to 50 minutes.                                                                                                                                                                                                                                                                                                                                                                                                                                                                                                                                                                                                                                                                                                                                                                                                    |
| <i>Data analysis</i>               | <p>Elements from the grounded theory approach were used to develop a conceptual model derived from the data. As for the first part of our study, data analysis was based on two steps: open coding and axial coding.</p> <ul style="list-style-type: none"> <li>- Open coding was used to examine data and conceptualize it into codes. Examples of codes extracted from the quotations of participants talking about the management of existential suffering: explore the suffering, listen to the patient or seeking help from a psychologist.</li> <li>- Axial coding was the second step of the analysis. It consisted of reassembling our codes into broader categories in order to better understand the facets and associations between them. Examples of them: being present or working together.</li> </ul> |
| <i>Criteria to ensure validity</i> | <ul style="list-style-type: none"> <li>- Four full recordings were independently coded by three researchers and discussed together at different stages during the analysis.</li> <li>- The coding tree and the development of the analysis was discussed with all researchers in regular meetings.</li> <li>- Quotes per main category were selected by the first author and approved by all co-authors.</li> </ul>                                                                                                                                                                                                                                                                                                                                                                                                  |

## 122 RESULTS

123

### 124 Participants

125 As described in our previous paper (10), twenty-seven professionals were contacted between  
126 January and April 2016 to participate in this study. Only one did not answer our request, thus  
127 twenty-six people were interviewed. Participant characteristics are described in **Supporting**  
128 **information 1: Table 1**. During one of the interviews, the recorder stopped after 10 minutes,  
129 without the investigator realizing it. We therefore decided to exclude this participant's testimony  
130 from the second part of the analysis.

131

### 132 Professionals' perspectives on the management of existential suffering as a motive for 133 requesting assisted suicide

134

#### 135 1. Difficulties when facing these kinds of requests

136 When professionals were asked if they encountered any difficulties when faced with these  
137 types of requests, 24 of them reported some kind of struggles. The coding of their statements  
138 resulted in two main types of difficulties: 1. Difficulties linked to a feeling of helplessness in the  
139 face of these situations and 2. Difficulties related to the conflict of values that these situations  
140 may cause. **Table 2** summarizes these findings and include quotes from participants. In  
141 general, most of them reported that these demands were challenging and that this could put  
142 them in difficulty. We found that, although most participants agreed that existential suffering is  
143 no less important than physical suffering, it remains somehow difficult to grasp and very  
144 controversial.

145 In spite of the above-described difficulties, 7 out of the 25 participants (of which 4 EXIT  
146 volunteers) said they were comfortable with these requests, even more so as we get older.  
147 Here is an illustration:

148



149            *"The older I get, the more I am understanding I am of these demands. That's what Mrs.*  
150 *X used to say: "She (another EXIT volunteer) is young, she believes that life is eternal. You're*  
151 *old, you know you're slowly going down so you're aware of that. "" (P20/EV)*

152  
153  
154  
155

**Table 2 - Difficulties encountered when facing existential suffering in AS requests**

n\*, number of participants who mentioned the category or code (N=25)

| Categories                                              | n*        | Codes                                                                                       | n* | Participants' Quotes                                                                                                                                                                                                                                                                                                                                                                                                                                                                                                                                  |
|---------------------------------------------------------|-----------|---------------------------------------------------------------------------------------------|----|-------------------------------------------------------------------------------------------------------------------------------------------------------------------------------------------------------------------------------------------------------------------------------------------------------------------------------------------------------------------------------------------------------------------------------------------------------------------------------------------------------------------------------------------------------|
| <b>Difficulties linked to a feeling of helplessness</b> | <b>20</b> | Feeling of helplessness                                                                     | 9  | <i>"I think we also have the right to admit our helplessness. I think it's also healthy to be able to do so. And the idea is not to spread false hopes, that's it. I think we can also affirm our own personal limits; I think that's important. Now it's true that there are many situations, beyond these, there are many situations that put me in front of my own limits, that generate a certain frustration in me, in my possibilities of being able to help the person, in spite of the tools that I can have at my disposal." (P8/PallCP)</i> |
|                                                         |           | Not being able to give meaning to the patient's life                                        | 6  | <i>"How do you expect to be able to give a reason to live to someone who has no one left, who is all alone, who has no family, no friends, and who stays at home staring into space because he can't do anything anymore? (...) Frankly, I don't see how, if we were fairies perhaps..." (P19/EV)</i>                                                                                                                                                                                                                                                 |
|                                                         |           | Difficult to distinguish between existential suffering and depression                       | 5  | <i>"What's difficult for us is also depression, it is all very well to label it as depression, to treat it, but I think the line between the two is not easy either. I understand that a depressed patient who hit rock bottom doesn't want to live anymore but at the same time, when we try to improve it, we don't always manage to give the patient meaning again." (P7/PallCP)</i>                                                                                                                                                               |
|                                                         |           | Difficult because these are always very complex situations (with no right or wrong answers) | 4  |                                                                                                                                                                                                                                                                                                                                                                                                                                                                                                                                                       |
|                                                         |           | Difficult because I'm not trained to deal with it                                           | 3  |                                                                                                                                                                                                                                                                                                                                                                                                                                                                                                                                                       |
|                                                         |           | Difficult to measure                                                                        | 3  |                                                                                                                                                                                                                                                                                                                                                                                                                                                                                                                                                       |
|                                                         |           | Difficult to treat                                                                          | 2  |                                                                                                                                                                                                                                                                                                                                                                                                                                                                                                                                                       |
| Lack of financial means                                 | 1         |                                                                                             |    |                                                                                                                                                                                                                                                                                                                                                                                                                                                                                                                                                       |
| <b>Difficulties related to a</b>                        | <b>10</b> | Conflict of values                                                                          | 6  | <i>"Yes, I am experiencing difficulties that I still find hard to qualify. Finally, I am groping around a bit because I find it strange to live in a society where, for so long, people had to fight for life, to be alive and to live, and now we are fighting</i>                                                                                                                                                                                                                                                                                   |

156

|                            |                                   |                                                                                                                                                                                                                                                         |
|----------------------------|-----------------------------------|---------------------------------------------------------------------------------------------------------------------------------------------------------------------------------------------------------------------------------------------------------|
| <b>conflict<br/>values</b> | <b>of</b><br><br>It challenges me | <br><br>6<br><br><i>to die. I say to myself, "But what kind of society are we in?" I also have difficulties, because in fact my own mother talked to me a lot about EXIT (...) So I am personally very much in conflict with all that." (P5/PallCP)</i> |
|----------------------------|-----------------------------------|---------------------------------------------------------------------------------------------------------------------------------------------------------------------------------------------------------------------------------------------------------|

157

## 158 **2. Acceptability of existential suffering as a motive for AS**

159 A vast majority of the participants (17 out of 25) viewed existential suffering as a justifiable  
160 reason for requesting AS, especially as a last resort, after having exhausted all other  
161 alternatives. The main reason addressed was the fact that one cannot judge the suffering of  
162 others, because it is something so personal, intimate and because suffering cannot be limited  
163 to a disease status or a somatic cause. Here is an illustration by a palliative care provider:

164

165 *“Yes, this is a fair reason for such a request. Well, she can of course ask because who*  
166 *am I to say she can't? Then you have to question this request and then try to find out why, how*  
167 *and where it comes from, on what it is based. But the request is of course legitimate. Suicide*  
168 *is when the suffering becomes too great. All means are good as long as I can stop this*  
169 *suffering. And when I try a whole panoply of solutions that no longer work or that don't work,*  
170 *well, that's it, I'm going to look for others. And this (assisted suicide) is one of the solutions, of*  
171 *course. (P3/PallCP)*

172

173 Although existential suffering could be an acceptable reason for a request, it did not  
174 always mean for the participants that the request had to be granted. A primary care provider  
175 expresses this nuance:

176

177 *“I think the patient's request is legitimate. Totally legitimate in all cases. Now accessing*  
178 *it is another story. It's really not the same thing. (...) It is always legitimate because that's what*  
179 *they want and they have the right to want something because they are in a situation where*  
180 *they think this (AS) is necessary. That being said, in life there are a lot of things that we want*  
181 *but can't have. And then the medical profession has to decide whether they want to become*  
182 *murderers or not.” (P24/PrimCP)*

183

184           Since the question in our interview concerned the acceptability of existential suffering  
185 in requesting AS, not in obtaining it, only a few participants went so far as to defend existential  
186 suffering as a justifiable reason for obtaining AS. On the contrary, 4 out of 25 participants  
187 considered that existential suffering was not a justifiable reason for requesting AS, as  
188 expressed here by an EXIT volunteer:

189

190           *“I don't think so, I don't think so (that existential suffering is a justifiable reason for*  
191 *requesting AS). I can imagine that people are alone, abandoned, sad, but for me it is not a*  
192 *sufficient reason. I mean, there is no age for that. A young person aged 20 or 30 who is just*  
193 *fed up with it because life is too difficult and all, would it mean that we should consider AS for*  
194 *this kind of people? (...) Yes, there has to be some kind of physical suffering or a real loss of*  
195 *autonomy.” (P21/EV)*

196

197           Finally, 4 participants (out of 25) found it difficult to take a position on this issue, such  
198 as illustrated by this participant:

199

200           *“To say what is right, not right, I can't tell you. I'm a poor human being trying to get by.*  
201 *I think it's a request that we can, that we must understand. If there is a request, we have to*  
202 *hear it.” (P14/PallCP)*

203

### 204           **3. Management of patients with existential suffering**

205           On the basis of the professionals' accounts, we identified 9 ways of managing existential  
206 suffering that were ranked according to the frequency of their occurrence: being present,  
207 respect, explore the suffering, give meaning, working together, psychological support, spiritual  
208 support, relieve physical symptoms and palliative sedation. A summary of these findings with  
209 quotes from participants can be found in **Table 3**.

210 **Table 3 - Management of existential suffering in AS requests**

211

212 n\*, number of participants who mentioned the category or code (N=25)

213

| Categories                  | n*        | Codes                               | n* | Participants' Quotes                                                                                                                                                                                                                                                                                                                                                                                                                                                                                                                                                                                                                                                                                                                                                                                                                                                                                                                                       |
|-----------------------------|-----------|-------------------------------------|----|------------------------------------------------------------------------------------------------------------------------------------------------------------------------------------------------------------------------------------------------------------------------------------------------------------------------------------------------------------------------------------------------------------------------------------------------------------------------------------------------------------------------------------------------------------------------------------------------------------------------------------------------------------------------------------------------------------------------------------------------------------------------------------------------------------------------------------------------------------------------------------------------------------------------------------------------------------|
| <b>Being Present</b>        | <b>25</b> | Being present                       | 20 | <i>"I attach a certain importance, when we are in such a situation, to the fact that we are, that there is our presence. And I think that maybe facing all this suffering that we can't reduce, well the fact that we can somehow share it, I think it makes sense. (...) Why, because we are not alone in the world. Because we exist for each other. And I think that especially in the attitude that I am going to have, as a therapist, to show him that I am interested in what he is going through, maybe I won't be able to respond (to his suffering) (...) But the fact that he can say it and share it, I think that makes a lot of sense. I think that an archaic anguish that one can have, that one can live, is to no longer exist for the other, really. To be "alone in the world". And I think that what we can bring as a team, (...) is to be able to offer them this presence, this idea that that they exist for us." (P8/PallCP)</i> |
|                             |           | Include relatives                   | 15 |                                                                                                                                                                                                                                                                                                                                                                                                                                                                                                                                                                                                                                                                                                                                                                                                                                                                                                                                                            |
|                             |           | Listen to the patient               | 12 |                                                                                                                                                                                                                                                                                                                                                                                                                                                                                                                                                                                                                                                                                                                                                                                                                                                                                                                                                            |
|                             |           | Create a network around the patient | 10 |                                                                                                                                                                                                                                                                                                                                                                                                                                                                                                                                                                                                                                                                                                                                                                                                                                                                                                                                                            |
|                             |           | Reassure the patient                | 6  |                                                                                                                                                                                                                                                                                                                                                                                                                                                                                                                                                                                                                                                                                                                                                                                                                                                                                                                                                            |
|                             |           | Set up home care volunteers         | 6  |                                                                                                                                                                                                                                                                                                                                                                                                                                                                                                                                                                                                                                                                                                                                                                                                                                                                                                                                                            |
|                             |           | Set up home care nurses             | 4  |                                                                                                                                                                                                                                                                                                                                                                                                                                                                                                                                                                                                                                                                                                                                                                                                                                                                                                                                                            |
| Spend time with the patient | 2         |                                     |    |                                                                                                                                                                                                                                                                                                                                                                                                                                                                                                                                                                                                                                                                                                                                                                                                                                                                                                                                                            |
| <b>Respect</b>              | <b>25</b> | Respecting the patient's decision   | 21 | <i>"We tell people what we can do, then we are very respectful of their choice in this house (palliative care unit). That is to say that if someone has already contacted EXIT before, we are not going to try by all means to prevent them from resorting to EXIT. We will explain to them what we can do for them. (...) We're just very respectful of their choice, (...) we remain very neutral about it. And we say what we can offer according to people's fears and according to what we feel is the reason for their request to EXIT and then the choice is theirs." (P15/PallCP)</i>                                                                                                                                                                                                                                                                                                                                                              |

|                              |           |                                           |          |                                                                                                                                                                                                                                                                                                                                                                                                                                                                                                                                                                                                                                                                                                                                                                                                                                                     |
|------------------------------|-----------|-------------------------------------------|----------|-----------------------------------------------------------------------------------------------------------------------------------------------------------------------------------------------------------------------------------------------------------------------------------------------------------------------------------------------------------------------------------------------------------------------------------------------------------------------------------------------------------------------------------------------------------------------------------------------------------------------------------------------------------------------------------------------------------------------------------------------------------------------------------------------------------------------------------------------------|
|                              |           | Not judging the patient (or his decision) | 6        |                                                                                                                                                                                                                                                                                                                                                                                                                                                                                                                                                                                                                                                                                                                                                                                                                                                     |
|                              |           | Showing respect to the patient            | 4        |                                                                                                                                                                                                                                                                                                                                                                                                                                                                                                                                                                                                                                                                                                                                                                                                                                                     |
| <b>Explore the suffering</b> | <b>21</b> |                                           |          | <i>"I often hear myself ask them "But what would make you at some point speed up the process (of assisted suicide)?" And then, depending on what they tell me, it could be pain, it could be the fear of suffocation, it could be the fear of not going through the same thing as her cousin Rose, for example, well that's what I'm exploring. Exploring the fears, exploring the limits of home care, exploring what really motivates (the request)". (P4/PallCP)</i>                                                                                                                                                                                                                                                                                                                                                                             |
| <b>Give meaning</b>          | <b>20</b> | Taking care of the identity               | 16       | <i>"There is a relevant element. It's that often the illness, the severe illness, irrupted into these people's life and this constituted a threshold. And indeed, with respect to time, there often is a fracture between the "before of who I was once" and the "now" where people often take an « ill person » identity. And their identity is now limited to the issue of being ill. And maybe the idea here is to broaden all this and find out who they were before. So what I'm also doing is 'fishing", looking into their past, to see a little bit who these people were before, what they were doing, and so on. (...) What does their illness mean to them in relation to their existence? All of this in the idea of re-establishing a certain continuity between the before and the now of who I am as a sick person." (P8/PallCP)</i> |
|                              |           | - Let the patient recount her story       | - 1<br>3 |                                                                                                                                                                                                                                                                                                                                                                                                                                                                                                                                                                                                                                                                                                                                                                                                                                                     |
|                              |           | - Restoring value to the patient          | - 7<br>5 |                                                                                                                                                                                                                                                                                                                                                                                                                                                                                                                                                                                                                                                                                                                                                                                                                                                     |
|                              |           | - Giving back a role to the patient       | - 5<br>4 |                                                                                                                                                                                                                                                                                                                                                                                                                                                                                                                                                                                                                                                                                                                                                                                                                                                     |
|                              |           | - Enhance patients' resources             | - 4      |                                                                                                                                                                                                                                                                                                                                                                                                                                                                                                                                                                                                                                                                                                                                                                                                                                                     |
|                              |           | - Taking care of the identity             |          |                                                                                                                                                                                                                                                                                                                                                                                                                                                                                                                                                                                                                                                                                                                                                                                                                                                     |
|                              |           | Give meaning                              | 13       |                                                                                                                                                                                                                                                                                                                                                                                                                                                                                                                                                                                                                                                                                                                                                                                                                                                     |
|                              |           | - Give meaning                            | - 1      |                                                                                                                                                                                                                                                                                                                                                                                                                                                                                                                                                                                                                                                                                                                                                                                                                                                     |
|                              |           | - Keep hope until the end                 | 3<br>4   |                                                                                                                                                                                                                                                                                                                                                                                                                                                                                                                                                                                                                                                                                                                                                                                                                                                     |
|                              |           | Suggest activities                        | 9        | <i>"But we still try to add more color to their day, if only for the relationship with the caregivers, by animation activities, we still try to encourage them. (...). Let's say that afterwards, it is through the informal daily meetings that we try to reconnect, to make the person realize that life is not so bad, even here (in the retirement home). That it still deserves to be lived for a little while." (P26/PrimCP)</i>                                                                                                                                                                                                                                                                                                                                                                                                              |
| <b>Working together</b>      | <b>18</b> | Interdisciplinarity                       | 16       | <i>"It's a bundle of things that makes people feel better (...) and then you can actually make a small contribution. I think that you have to listen to them, you have to try chemistry (drugs) if it can help, you have to set up the interlocutors they need. Maybe it will rather be a psychotherapist, maybe rather someone for spiritual needs, perhaps</i>                                                                                                                                                                                                                                                                                                                                                                                                                                                                                    |

|                                  |           |                                                                                                              |                                                                                                                                                                                                                                                                                                                                                                                                                                                                                                                                                                                       |
|----------------------------------|-----------|--------------------------------------------------------------------------------------------------------------|---------------------------------------------------------------------------------------------------------------------------------------------------------------------------------------------------------------------------------------------------------------------------------------------------------------------------------------------------------------------------------------------------------------------------------------------------------------------------------------------------------------------------------------------------------------------------------------|
|                                  |           |                                                                                                              | <p>someone on the team with whom she really has a great feeling. (...) Then there's a bit of sophrology, then there's relaxation, in short there are all these complementary approaches that we also use to make people feel better." (P15/PallCP)</p>                                                                                                                                                                                                                                                                                                                                |
|                                  |           | <p>Use of complementary approaches 6<br/> Have a holistic vision 4<br/> Call on the social worker 3</p>      |                                                                                                                                                                                                                                                                                                                                                                                                                                                                                                                                                                                       |
| <b>Psychological support</b>     | <b>15</b> | <p>Seeking help from a psychologist 8</p> <p>Seeking help from a psychiatrist 6</p>                          | <p>"Sometimes people are very fearful of the whole "shrink world". And it's true that when you begin offering psychological support, some people think "No, I'm not crazy". I would like to be able to help my colleagues and sometimes myself to succeed in explaining what we do when we deal with existential suffering, what resources we look for and what is the usefulness of a shrink. Whether it is a psychologist or a psychiatrist, they have specialized knowledge." (P4/PallCP)</p>                                                                                      |
| <b>Spiritual support</b>         | <b>12</b> | <p>Explore spirituality 7</p> <p>Call on a chaplain 7<br/> Talk about death 2<br/> Talk about religion 2</p> | <p>"The religious, spiritual aspect is something that we don't talk about as much. I think we still have to work on that . (...) On the religious aspect, the patients willingly talk about it when it is a question of support, of help. Concerning spirituality, it's a little more complicated. We have patients who talk about it spontaneously, but it's quite rare, and for us, if we want to tackle it, I think we have to have already worked on our own spirituality to know what we're talking about and how we're going to approach it with the patient." (P11/PallCP)</p> |
| <b>Relieve physical symptoms</b> | <b>11</b> | <p>Relieve physical symptoms 9</p> <p>Use medication 5</p>                                                   | <p>"One of the first things I'm going to look for is the notion of pain, the notion of physical suffering. And besides this, beyond these situations (of requesting AS), I always pay attention to whether the person is in pain. When we are in physical suffering like that, there is often a certain emotion attached to it, a sadness, a loss of hope, and it is not in these conditions that we can reflect. And often the reflex is " I can't take it anymore; I prefer to leave". (P8/PallCP)</p>                                                                              |



|                            |   |                                                                                                                                                                                                                                                                                                                                                                               |
|----------------------------|---|-------------------------------------------------------------------------------------------------------------------------------------------------------------------------------------------------------------------------------------------------------------------------------------------------------------------------------------------------------------------------------|
| <b>Palliative sedation</b> | 6 | Call on an occasional 2 therapist<br><br><i>“And then something that is used a lot here is continuous sedation. It's true that it's more easily used for physical symptoms such as dyspnea, it's something that we propose a lot for dyspnea, but on the other hand we also want to propose it in case of existential suffering, but that's more difficult.” (P16/PallCP)</i> |
|----------------------------|---|-------------------------------------------------------------------------------------------------------------------------------------------------------------------------------------------------------------------------------------------------------------------------------------------------------------------------------------------------------------------------------|

215 *Being present*

216 When asked about how existential suffering should be managed, all participants reported the  
217 importance of being present with your patient. Presence was seen as a way of creating this  
218 particular bond with the patient, allowing him to share his human experience, and his suffering.  
219 The presence as such was considered to be therapeutic, even if there were sometimes “no  
220 other solutions”. A few other codes were included in this category, such as including relatives,  
221 creating a network or listening, all highlighting how presence can be offered to patients.

222

223 *Respect*

224 All participants also referred to the importance of respecting the patient’s decision, not judging  
225 it, and showing respect to the patient. This category refers to an indispensable attitude to have,  
226 according to our participants, when supporting patients with existential suffering. Like the  
227 previous category, we can here note the emphasis placed by our participants on "being" rather  
228 than on "doing".

229

230 *Explore the suffering*

231 A vast majority of the participants highlighted the importance of exploring the suffering of these  
232 patients, taking the time to understand their reasons for requesting AS. According to them,  
233 exploring the suffering was one of the essential first steps before being able to think of other  
234 alternatives.

235

236 *Give meaning*

237 20 out of the 25 participants reported the importance of giving meaning to their patients’ lives.  
238 This actually echoes their interpretations of existential suffering, as described in our previous  
239 paper: “a life that isn’t worth living any longer” and/or “a life that doesn’t make sense anymore”.  
240 According to these professionals, there are several ways to give meaning to their patients’  
241 lives. The codes grouped in this category are: taking care of the identity, give meaning and  
242 suggest activities. Each of those includes sub-codes that are listed in **Table 3**. For many

243 participants, a way to bring meaning back into someone's life was to take care of the person's  
244 identity, by helping her tell her story, by highlighting her identity and resources. While not  
245 referring to them by that name, these testimonials were reminiscent of narrative approaches  
246 that are used in existential psychotherapies.

247

#### 248 *Working together*

249 The necessity of working together, of using "interdisciplinarity" was mentioned by more than  
250 two-thirds of the participants. It should be noted that this term of interdisciplinarity seemed  
251 sometimes vague. On the other hand, what was always emphasized was that it is never one  
252 person who holds the solution but that responses to existential suffering are plural and  
253 therefore emanate from many different people who have to collaborate.

254

#### 255 *Psychological support*

256 When confronted to existential suffering, seeking help from a psychologist or a psychiatrist  
257 was suggested by many participants. According to our participants, mental health experts may  
258 have "better tools" to explore and to manage this type of suffering.

259 It should be noted that 3 participants thought the opposite: psychologists and  
260 psychiatrist would not be of great utility when managing existential suffering, as expressed by  
261 this participant:

262

263 *"I think the psychologist is useless. Because what are these people going to believe?  
264 They will believe that we consider them sick people while I don't think it's a disease." (P21/EV)*

265

#### 266 *Spiritual support*

267 Half of the participants mentioned the usefulness of addressing people's spiritual needs. The  
268 codes grouped in this category are: explore spirituality, call on a chaplain, talk about death and  
269 talk about religion. Their testimonials were not always clear on how to explore spirituality and  
270 many reported that it was not always easy to talk about it: because they didn't have the skills,

271 because it wasn't "their job", or because it was such an intimate subject and therefore difficult  
272 to discuss with patients.

273

274 *Relieve physical symptoms*

275 As expressed by this participant working as a psychologist in palliative care (see **Table 3**), 11  
276 participants recalled the need to, first and foremost, properly manage physical suffering.  
277 Relieving physical symptoms was always seen as something we must have thought of before  
278 moving on to the next step.

279

280 *Palliative sedation*

281 A few participants working in palliative care mentioned the use of continuous sedation to  
282 alleviate existential suffering. As the quote in **Table 3** illustrates it, most said they were more  
283 comfortable when it was applied to the relief of physical symptoms but that this could happen,  
284 as a last resort and after having explored alternatives, in case of existential suffering, though  
285 recognizing that it was controversial.

286

#### 287 **4. Whose role is it to manage existential suffering?**

288 When participants were questioned about the roles around managing existential suffering, two  
289 types of responses emerged: 14 out of 25 thought that it is a shared responsibility among all  
290 health care professionals, pointing out the importance of interdisciplinarity. And among all of  
291 them, the most cited were, in order, physicians, psychologists, nurses and chaplains. This is  
292 illustrated by the testimony of a palliative care caregiver:

293

294 *"Oh yes, I think that's our role. It's the role of an interdisciplinary team, well we're all*  
295 *interested in it, it's the role of all of us. And when we do interdisciplinary meetings, we try to*  
296 *put things in place at all levels, whether it's at the level of the psychologist, the physician, the*  
297 *caregiver, the occupational therapist, the physiotherapist who can also suggest solutions, the*

298 *social worker. There you have it, all the professionals revolving around the patient.”*

299 *(P1/PallCP)*

300

301 This part of interview also allowed the participants to recall the importance of including  
302 patients’ relatives. Finally, among participants who thought existential suffering implies a  
303 shared responsibility, three of them even suggested that it was the responsibility of the entire  
304 society to better take care of these patients.

305 However, the rest of the participants (11 out of 25) expressed that this task, of  
306 managing existential suffering, was above all the prerogative of physicians, especially of  
307 general practitioners. We should here clarify that this task was seen more as that of a  
308 “conductor” who has to “coordinate” the care/management rather than do everything on his  
309 own.

310 As expressed here, it should be noted that among the six EXIT volunteers, only two  
311 considered that it was also their responsibility to manage existential suffering. The rest of the  
312 them thought it was not.

313

## 314 **DISCUSSION**

315

316 Our results showed that almost all participants encountered difficulties when facing existential  
317 suffering, most of them related to a feeling of helplessness but also difficulties linked to the  
318 conflict of values that these situations can lead to. Regarding the acceptability of existential  
319 suffering in the context of an AS request, two-thirds of the participants considered it to be a  
320 justifiable reason for requesting AS. It should be noted that this did not necessarily mean that  
321 they agreed that this request should also be granted. Concerning the management of  
322 existential suffering, our participants expressed several key points and approaches to adopt  
323 when taking care of these patients. These include the notion of being present, showing respect,  
324 exploring the suffering, giving meaning, working together, psychological support, spiritual  
325 support, relief of physical symptoms and palliative sedation. As to the question of roles, the

326 opinions of our participants were divided, with one party thinking that the responsibility should  
327 be shared among all health care professionals and the other thinking that it is mainly the  
328 prerogative of physicians.

329         Having already pointed out that existential suffering is plural, it is not surprising to find  
330 that the management of existential suffering has to be plural as well and involve an effective  
331 interdisciplinary care team. These results corroborate what previous authors suggested when  
332 aiming to relieve existential suffering.(17,19,20) This also fits with the organization of palliative  
333 care units in Switzerland, where interdisciplinarity is a concept and a method of operation that  
334 is now mostly well implemented.

335         As first steps in dealing with existential suffering, participants focused on crucial  
336 attitudes, rather than concrete approaches. Those include the notions of being present for your  
337 patient and showing her respect, qualities that are not necessarily taught in depth in medical  
338 schools. As Amonoo and colleagues (19) point out, “one of the privileges of being a clinician  
339 is being present for many of their patients’ significant moments – birth, death, life-altering  
340 illness, major accidents – but clinicians usually do not receive formal training to address the  
341 existential weight of these situations and it is not a clearly defined part of their role.” In this  
342 regard, several participants suggested that it was necessary to improve the training of  
343 physicians, to give them the tools to better listen and support patients with existential suffering.  
344 The hidden potentials behind a therapeutic presence have been well described by Covington  
345 (27) who defined “caring presence” as a “way of being—of deeply connecting—with another in  
346 a relationship” thus providing a “safe space for the patient to share suffering and find meaning  
347 in the illness experience”.

348         Also of interest, we found that all participants referred to themes related to existential  
349 psychotherapies, like meaning-centered approach or dignity psychotherapy, although they did  
350 not refer to them by this label. Those themes included the importance of giving meaning, let  
351 the patient recount her story or taking care of her identity. These approaches, drawing on the  
352 philosophy of existentialism pictured in particular by Victor Frankl and Irvin Yalom, surely  
353 represent a means of alleviating existential suffering by bolstering meaningful reflection at the

354 end of life.(9,16) Unfortunately, most clinicians lack training in such approaches and this is  
355 certainly a path for improvement in the future. Amonoo and colleagues (19) also proposed a  
356 possible framework, utilizing existential themes, for addressing patients with existential  
357 suffering. This framework includes steps such as “take a narrative history to enhance  
358 perspective”, “help the patient actively enlist sources of resilience” and “help patients live in  
359 accordance with their core values”.

360 Only twelve out the twenty-five participants mentioned the value of exploring patients’  
361 spiritual needs when facing existential suffering. This finding may seem rather low taking into  
362 consideration that this suffering is sometimes described as a spiritual one. These results,  
363 however, corroborate previous findings (29–31): patients at the end of life report that spiritual  
364 care is infrequently provided by their medical providers although they consider that religion  
365 and spirituality dimensions are important aspects of end-of-life care. This is also noteworthy  
366 because current palliative care guidelines include the importance of providing spiritual  
367 care.(21) A 2013-study asking the question “Why is spiritual care infrequent at the end of life  
368 ?” showed that lack of spiritual care training was the strongest predictor of spiritual care  
369 provision.(1,31) One can only speculate about the reasons underlying this finding but in secular  
370 hospitals, aiming to be open to all religious practices, one can perhaps expect this reserve  
371 towards spirituality, especially if it is viewed as mostly religious in nature. Future studies may  
372 be interesting to exploring this issue further.

373 The acceptability of palliative sedation for refractory existential suffering also raises  
374 controversial issues that have been explored in the literature recently.(4,12,13,32) A 2020  
375 review (12) reports that “physicians do not hold clear views or agree if and when palliative  
376 sedation for existential suffering is appropriate” and that clinicians continue to be more  
377 favorable to palliative sedation for physical pain than for existential suffering. Ultimately,  
378 whether or not we are open to palliative sedation, it is our duty as clinicians, as stated by the  
379 SAMS (Swiss Academy of Medical Sciences) to have explored this suffering and to have  
380 proposed alternatives. Where to stop in the exploration of alternatives is however still an  
381 unanswered question. As with assisted suicide, the SAMS also sets out a normative framework

382 for the use of palliative sedation in cases of existential suffering. These are based on the  
383 special considerations recognized by the EAPC (European Association for Palliative Care), in  
384 particular: the patient has to be in an advanced stage of a terminal illness, the refractoriness  
385 of his symptoms has been evaluated several times by clinicians skilled in psychological care,  
386 the evaluation has been made in the context of a multidisciplinary case conference, and  
387 repeated trials of respite sedation with intensive intermittent therapy have been performed. (26)

388 Finally, regarding the question of roles, our study did not explore this issue in detail,  
389 but it did highlight the fact that all of us, as health care professionals, are concerned by this  
390 issue and that we all have a role to play in dealing with existential suffering. This surely includes  
391 physicians, who, according to almost half of our participants have an even greater role to play  
392 in the management of these patients. Unfortunately, studies on this topic show that patients  
393 are dissatisfied with the lack of concern of physicians and nurses for their existential  
394 needs.(33,34) This further reinforces the idea that clinicians' education has to address these  
395 dimensions of care. Moreover, similar to psycho-existential approaches which do not  
396 necessarily need to be conducted by psychotherapists, providing spiritual care should not only  
397 be the prerogative of chaplains.(19,35)

398 As this is the first study investigating the perspectives of professionals on existential  
399 suffering, its acceptability, and its management in a country where AS is legal, it offers a unique  
400 opportunity to reflect on what are desirable responses to existential suffering when it is part of  
401 these requests. Existential suffering is plural and its management certainly implies a multiplicity  
402 of responses as well. Among these responses are the notions of being present, giving  
403 meaning, providing psychological and spiritual support, skills that are not, in modern medicine,  
404 necessarily assigned to physicians. As Kissane (20) points out, "the skills referred to herein  
405 are based on the physician as healer, listener, and doctor to the person rather than the  
406 symptom or disease".

407 We hope that our findings will reinforce the work already underway to improve the  
408 training of clinicians in the exploration and treatment of existential suffering, as well as to  
409 perhaps more systematically implement psycho-existential approaches and spiritual care



410 when confronted with these situations. All questions are far from being answered though and  
411 future research should focus on developing and implementing these approaches as well as to  
412 reflect on when it can be considered that the exploration of alternatives has been sufficient,  
413 implying that AS can become an acceptable alternative when facing existential suffering.

414 This study entails several limitations that have been described in our previous paper.  
415 Those include limitations related to the qualitative nature of the study and the fact that the  
416 sample size was small and only from the French-speaking part of Switzerland, leading to a  
417 lack of generalization of our results. This study also has the disadvantage of only focusing on  
418 the representations of professionals, and not on those of people requesting AS. However, we  
419 found that the solutions proposed here are close to what can be found in the previous literature  
420 as well as to the few studies that have reported patients' wishes.(6,17–20) As mentioned in  
421 the results section, it is necessary to recall here the limitation of our interview question related  
422 to the acceptability of existential suffering as a motive for AS. Indeed, our question only  
423 involved the request and not the issue of granting the request. This may have overestimated  
424 the number of participants in agreement with the practice of AS in the case of existential  
425 suffering.

426

## 427 **CONCLUSION**

428

429 This study brings to light that the management of existential suffering has to be plural and  
430 involve an effective interdisciplinary team. The approaches proposed here include the notion  
431 of being present, respect, explore the suffering, give meaning, working together, psychological  
432 support, spiritual support, relieve physical symptoms and palliative sedation. Our study also  
433 highlights that professionals confronted with these situations still encounter many difficulties  
434 and that their training needs to address these issues and give them the tool to better take care  
435 of patients with existential suffering. Reinforcing interdisciplinary and multiprofessional  
436 approaches is surely also key. We hope that this work will reinforce the efforts that are being

437 made in this direction and that it will also stimulate the ongoing reflection on the acceptability  
438 of existential suffering as a reason for requesting AS.

439

440

#### 441 **ABBREVIATIONS**

442

443 **AS:** assisted suicide

444 **CCER:** Commission Cantonale d’Ethique de la Recherche (Swiss Cantonal Ethics Committee)

445 **EAPC:** European Association for Palliative Care

446 **EV:** *EXIT* Volunteer

447 **EXIT:** name of a swiss right-to-die organization

448 **Pn:** Participant number

449 **PallCP:** Palliative Care Providers

450 **PrimCP:** Primary Care Providers

451 **SAMS:** Swiss Academy of Medical Sciences

452

453

#### 454 **ACKNOWLEDGMENTS**

455

456 The authors wish to show their gratitude to the participants in the study for their time and  
457 willingness to be interviewed. They would also like to thank their colleagues at the Institute of  
458 Ethics who provided insight on several occasions, as well as Claudia Ricci for reviewing the  
459 initial manuscript.

460

461

462

463

464

## 465 REFERENCES

- 466 1. Rodríguez-Prat A, Balaguer A, Booth A, Monforte-Royo C. Understanding patients'  
467 experiences of the wish to hasten death: an updated and expanded systematic review  
468 and meta-ethnography. *BMJ Open*. 2017 Sep 1;7(9):e016659.
- 469 2. Rurup ML, Onwuteaka-Philipsen BD, Jansen-van der Weide MC, van der Wal G. When  
470 being “tired of living” plays an important role in a request for euthanasia or physician-  
471 assisted suicide: patient characteristics and the physician’s decision. *Health Policy Amst*  
472 *Neth*. 2005 Oct;74(2):157–66.
- 473 3. Bruns F, Blumenthal S, Hohendorf G. [Assisted suicide in Germany: medical diagnoses  
474 and personal reasons of 117 decedents]. *Dtsch Med Wochenschr* 1946. 2016  
475 Feb;141(4):e32-37.
- 476 4. Rodrigues P, Crokaert J, Gastmans C. Palliative Sedation for Existential Suffering: A  
477 Systematic Review of Argument-Based Ethics Literature. *J Pain Symptom Manage*. 2018  
478 Jun 1;55(6):1577–90.
- 479 5. Kirk TW, Mahon MM, Palliative Sedation Task Force of the National Hospice and  
480 Palliative Care Organization Ethics Committee. National Hospice and Palliative Care  
481 Organization (NHPCO) position statement and commentary on the use of palliative  
482 sedation in imminently dying terminally ill patients. *J Pain Symptom Manage*. 2010  
483 May;39(5):914–23.
- 484 6. Boston P, Bruce A, Schreiber R. Existential Suffering in the Palliative Care Setting: An  
485 Integrated Literature Review. *J Pain Symptom Manage*. 2011 Mar 1;41(3):604–18.
- 486 7. Lo C, Panday T, Zeppieri J, Rydall A, Murphy-Kane P, Zimmermann C, et al. Preliminary  
487 psychometrics of the Existential Distress Scale in patients with advanced cancer. *Eur J*  
488 *Cancer Care (Engl)*. 2017 Nov;26(6).
- 489 8. Grech A, Marks A. Existential Suffering Part 1: Definition and Diagnosis #319. *J Palliat*  
490 *Med*. 2017 Jan;20(1):93–4.
- 491 9. LeMay K, Wilson KG. Treatment of existential distress in life threatening illness: a review  
492 of manualized interventions. *Clin Psychol Rev*. 2008 Mar;28(3):472–93.
- 493 10. Gagnard M-E, Hurst S. A qualitative study on existential suffering and assisted suicide  
494 in Switzerland. *BMC Med Ethics*. 2019 May 14;20(1):34.
- 495 11. Swiss Academy of Medical Sciences. Medical-ethical guidelines: Management of dying  
496 and death. *Swiss Med Wkly [Internet]*. 2018 Nov 30 [cited 2021 Jan 8];148(4748).  
497 Available from: <https://smw.ch/article/doi/smw.2018.14664>
- 498 12. Rodrigues P, Menten J, Gastmans C. Physicians’ perceptions of palliative sedation for  
499 existential suffering: a systematic review. *BMJ Support Palliat Care*. 2020 Jun;10(2):136–  
500 44.
- 501 13. Anquinet L, Rietjens J, van der Heide A, Bruinsma S, Janssens R, Deliens L, et al.  
502 Physicians’ experiences and perspectives regarding the use of continuous sedation until  
503 death for cancer patients in the context of psychological and existential suffering at the  
504 end of life. *Psychooncology*. 2014 May;23(5):539–46.
- 505 14. Rushton CH, Sellers DE, Heller KS, Spring B, Dossey BM, Halifax J. Impact of a  
506 contemplative end-of-life training program: being with dying. *Palliat Support Care*. 2009

- 507 Dec;7(4):405–14.
- 508 15. Gopal AA. Physician-Assisted Suicide: Considering the Evidence, Existential Distress,  
509 and an Emerging Role for Psychiatry. *J Am Acad Psychiatry Law*. 2015 Jun;43(2):183–  
510 90.
- 511 16. Breitbart W, Gibson C, Poppito SR, Berg A. Psychotherapeutic interventions at the end  
512 of life: a focus on meaning and spirituality. *Can J Psychiatry Rev Can Psychiatr*. 2004  
513 Jun;49(6):366–72.
- 514 17. Grech A, Marks A. Existential Suffering Part 2: Clinical Response and Management #320.  
515 *J Palliat Med*. 2017 Jan;20(1):95–6.
- 516 18. Fay Z, OBoyle C. How specialist palliative care nurses identify patients with existential  
517 distress and manage their needs. *Int J Palliat Nurs*. 2019 May 2;25(5):233–43.
- 518 19. Amonoo HL, Harris JH, Murphy WS, Abrahm JL, Peteet JR. The Physician’s Role in  
519 Responding to Existential Suffering: What Does It Mean to Comfort Always? *J Palliat*  
520 *Care*. 2019 Apr 10;0825859719839332.
- 521 20. Kissane DW. The relief of existential suffering. *Arch Intern Med*. 2012 Oct  
522 22;172(19):1501–5.
- 523 21. Best M, Leget C, Goodhead A, Paal P. An EAPC white paper on multi-disciplinary  
524 education for spiritual care in palliative care. *BMC Palliat Care*. 2020 Jan 15;19(1):9.
- 525 22. Martínez M, Arantzamendi M, Belar A, Carrasco JM, Carvajal A, Rullán M, et al. “Dignity  
526 therapy”, a promising intervention in palliative care: A comprehensive systematic  
527 literature review. *Palliat Med*. 2017 Jun;31(6):492–509.
- 528 23. Gasser P, Holstein D, Michel Y, Doblin R, Yazar-Klosinski B, Passie T, et al. Safety and  
529 efficacy of lysergic acid diethylamide-assisted psychotherapy for anxiety associated with  
530 life-threatening diseases. *J Nerv Ment Dis*. 2014 Jul;202(7):513–20.
- 531 24. Reiche S, Hermle L, Gutwinski S, Jungaberle H, Gasser P, Majić T. Serotonergic  
532 hallucinogens in the treatment of anxiety and depression in patients suffering from a life-  
533 threatening disease: A systematic review. *Prog Neuropsychopharmacol Biol Psychiatry*.  
534 2018 Feb 2;81:1–10.
- 535 25. Byock I. Taking Psychedelics Seriously. *J Palliat Med*. 2018 Apr 1;21(4):417–21.
- 536 26. Cherny NI, Radbruch L, Board of the European Association for Palliative Care. European  
537 Association for Palliative Care (EAPC) recommended framework for the use of sedation  
538 in palliative care. *Palliat Med*. 2009 Oct;23(7):581–93.
- 539 27. Covington H. Caring presence. Delineation of a concept for holistic nursing. *J Holist Nurs*  
540 *Off J Am Holist Nurses Assoc*. 2003 Sep;21(3):301–17.
- 541 28. Tornøe KA, Danbolt LJ, Kvigne K, Sørli V. The power of consoling presence - hospice  
542 nurses’ lived experience with spiritual and existential care for the dying. *BMC Nurs*.  
543 2014;13:25.
- 544 29. Astrow AB, Wexler A, Texeira K, He MK, Sulmasy DP. Is failure to meet spiritual needs  
545 associated with cancer patients’ perceptions of quality of care and their satisfaction with  
546 care? *J Clin Oncol Off J Am Soc Clin Oncol*. 2007 Dec 20;25(36):5753–7.

- 547 30. Phelps AC, Lauderdale KE, Alcorn S, Dillinger J, Balboni MT, Van Wert M, et al.  
548 Addressing spirituality within the care of patients at the end of life: perspectives of patients  
549 with advanced cancer, oncologists, and oncology nurses. *J Clin Oncol Off J Am Soc Clin*  
550 *Oncol.* 2012 Jul 10;30(20):2538–44.
- 551 31. Balboni MJ, Sullivan A, Amobi A, Phelps AC, Gorman DP, Zollfrank A, et al. Why Is  
552 Spiritual Care Infrequent at the End of Life? Spiritual Care Perceptions Among Patients,  
553 Nurses, and Physicians and the Role of Training. *J Clin Oncol.* 2013 Feb 1;31(4):461–7.
- 554 32. Tomczyk M, Dieudonné-Rahm N, Jox RJ. A qualitative study on continuous deep  
555 sedation until death as an alternative to assisted suicide in Switzerland. *BMC Palliat Care.*  
556 2021 May 14;20(1):67.
- 557 33. Peteet JR. Putting Suffering Into Perspective. *J Psychother Pract Res.* 2001;10(3):187–  
558 92.
- 559 34. Peteet JR, Balboni MJ. Spirituality and religion in oncology. *CA Cancer J Clin.* 2013  
560 Aug;63(4):280–9.
- 561 35. Kissane DW, Grabsch B, Clarke DM, Christie G, Clifton D, Gold S, et al. Supportive-  
562 expressive group therapy: the transformation of existential ambivalence into creative  
563 living while enhancing adherence to anti-cancer therapies. *Psychooncology.* 2004  
564 Nov;13(11):755–68.
- 565
